# Supplementary material
Source: PubMed Central journal article supplement (PMC8760838)
Supplement: mmc1.pdf [file mmc1.pdf]

**Supplementary Table 1.**

**Weekly positive rapid antigen tests in Austrian schools, per province.** Approximately 10% of the Austrian population has been tested weekly in this program, which started in February 2021. Primary schools (age 6-10) are open 5 days a week and pupils are tested twice per week. In secondary schools (age 10-15), half of the pupils go to school Monday and Tuesday and are tested on Monday; the other half attend Wednesday and Thursday, and are tested on Wednesday. (Exceptionally, schools use alternate weeks instead). Initially, only Lepu Medical tests were used; lately, some secondary schools started to use Flowflex (ACON) [52]. The frequency of school-testing has now been increased to 3-times a week. All staff wear FFP2 masks, secondary school pupils wear face masks in the classroom, primary school pupils wear masks when indoors outside of their class group. There is some variability to this general guideline for more specialized institutions.

|                         |              |              |              |              |              |              |              |
|-------------------------|--------------|--------------|--------------|--------------|--------------|--------------|--------------|
| Week starting           | 8.2.         | 15.2.        | 22.2.        | 1.3.         | 8.3.         | 15.3.        | 22.3         |
| Wien                    | 142*         | 250          | 258          | 429          | 345          | 606          | 599          |
| Niederösterreich        | 56*          | 103          | 187          | 209          | 212          | 195          | 234          |
| Oberösterreich          |              | 43           | 118          | 161          | 217          | 139          | 147          |
| Steiermark              |              | 43           | 109          | 148          | 122          | 134          | 145          |
| Salzburg                |              | 19           | 68           | 97           | 90           | 100          | 82           |
| Kärnten                 |              | 40           | 65           | 86           | 84           | 53           | 61           |
| Tirol                   |              | 13           | 42           | 54           | 66           | 43           | 60           |
| Burgenland              |              | 10           | 34           | 44           | 41           | 49           | 61           |
| Vorarlberg              |              | 15           | 23           | 19           | 11           | 6            | 16           |
| Total Positive          | 198          | 536          | 904          | 1247         | 1188         | 1325         | 1405         |
| Total Tests             |              |              |              |              |              |              |              |
| (appr.)                 | 470 k        | 1.3mil       | 1.4mil       | 1.4mil       | 1.5mil       | 1.6mil       | 1.7mil       |
| <b>Percent Positive</b> | <b>0.042</b> | <b>0.041</b> | <b>0.065</b> | <b>0.089</b> | <b>0.079</b> | <b>0.083</b> | <b>0.083</b> |

\* 75% and 80% of the cases, respectively, were confirmed by PCR in the first week; in later weeks, the % of false positives rose to about 40% [32].
